# Supplementary material for: Direct synthesis of oxazolines from olefins and amides using t-BuOI
Source: Royal Society of Chemistry journal article supplement (doi:10.1039/b706572h), 2007-01-01
Supplement: b706572h.pdf [file b706572h.pdf]

## Direct Synthesis of Oxazolines from Olefins and Amides Using *tert*-BuOI

### *Supporting Information*

Satoshi Minakata\*, Yoshinobu Morino, Toshihiro Ide, Yoji Oderaotoshi, and Mitsuo Komatsu

*Department of Applied Chemistry, Graduate School of Engineering, Osaka University,  
Yamadaoka 2-1, Suita, Osaka 565-0871, Japan*

### Experimental Procedures

#### General Methods.

Melting points were determined on a Yanagimoto micro melting point apparatus and are uncorrected. IR spectra were obtained on a Jasco FT/IR-410 infrared spectrophotometer. <sup>1</sup>H and <sup>13</sup>C NMR spectra were recorded on a JEOL FT-NMR JNM GSX-400 or EX-270 spectrometer (<sup>1</sup>H NMR, 400/270 MHz; <sup>13</sup>C NMR, 100/68 MHz) using tetramethylsilane as an internal standard. Mass spectra were measured with a Shimadzu Model GCMS-QP5000 spectrometer. High-resolution mass spectral data were obtained on a JEOL DX-303 mass spectrometer. Elemental analyses were performed at the Analytical Center, Faculty of Engineering, Osaka University. Flash column chromatography (FCC) was performed using silica gel FL60D (Fuji Silysia Chemical Co.). Preparative gel permeation liquid chromatography (GPLC) was performed on a JAI (Japan Analytical Industry) LC-908 instrument with JAIGEL 1H-2H columns and chloroform as the eluent. Analytical thin layer chromatography was performed using EM reagent 0.25 mm silica gel 60-F plates. Visualization was accomplished with UV light and spraying with an ethanolic phosphomolybdic acid solution followed by heating.

## General procedure for the synthesis of oxazolines.

To a mixture of amide (0.5 mmol), olefin (1.0 mmol) and NaI (1.5 mmol) in MeCN (3 mL) was added *t*-BuOCl (1.5 mmol). The mixture was allowed to stir in the dark at room temperature for the indicated time under an atmosphere of nitrogen, quenched with 0.3M aqueous Na<sub>2</sub>S<sub>2</sub>O<sub>3</sub> (3 mL), the solution extracted with CH<sub>2</sub>Cl<sub>2</sub>, dried over MgSO<sub>4</sub>, and concentrated under vacuum. The residue was purified by flash column chromatography on silica gel (eluent: hexane/ethyl acetate).

### 2.5-Diphenyl-2-oxazoline (1)

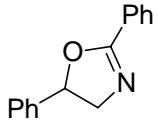 According to the above general procedure, benzamide (60 mg, 0.50 mmol) and styrene (104 mg, 1.00 mmol) were used, and the title compound isolated (60 mg, 53%). Spectroscopic data were in agreement with previously reported data for the material.<sup>1</sup> Colorless oil; TLC R<sub>f</sub> 0.21 (hexane/EtOAc, 4:1); <sup>1</sup>H NMR (CDCl<sub>3</sub>, 270 MHz) δ 3.99 (dd, 1H, *J* = 7.9, 14.7 Hz, -NCHHCHO-), 4.48 (dd, 1H, *J* = 10.1, 14.7 Hz, -NCHHCHO-), 5.66 (dd, 1H, *J* = 7.9, 10.1 Hz, -NCH<sub>2</sub>CHO-), 7.30-7.53 (m, 8H, ArH), 8.02 (d, 2H, *J* = 8.2 Hz, ArH).

### 2-(*p*-Methoxyphenyl)-5-phenyl-2-oxazoline (2a)

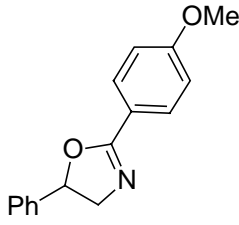 According to the above general procedure, *p*-methoxybenzamide (76 mg, 0.50 mmol) and styrene (104 mg, 1.00 mmol) were used, and the title compound isolated (46 mg, 37%). Spectroscopic data were in agreement with previously reported data for the material.<sup>2</sup> Brown solid; mp 58-60 °C; TLC R<sub>f</sub> 0.21 (hexane/EtOAc, 4:1); <sup>1</sup>H NMR (CDCl<sub>3</sub>, 400 MHz) δ 3.84 (s, 3H, OMe), 3.96 (dd, 1H, *J* = 8.0,

14.9 Hz, -NCHHCHO-), 4.45 (dd, 1H,  $J = 10.0, 14.9$  Hz, -NCHHCHO-), 5.62 (dd, 1H,  $J = 8.0, 10.0$  Hz, -NCH<sub>2</sub>CHO-), 6.93 (d, 2H,  $J = 8.8$  Hz, ArH), 7.30-7.40 (m, 5H, ArH), 7.96 (d, 2H,  $J = 8.8$  Hz, ArH).

### 2-(*p*-Nitrophenyl)-5-phenyl-2-oxazoline (2b)

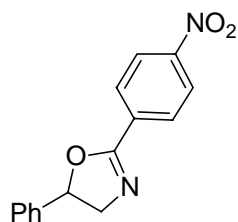

According to the above general procedure, *p*-nitrobenzamide (83 mg, 0.50 mmol) and styrene (108 mg, 1.04 mmol) were used, and the title compound isolated (90 mg, 67%). Spectroscopic data were in agreement

with previously reported data for the material.<sup>3</sup> Pale orange solid; mp 153-156 °C; TLC R<sub>f</sub> 0.19 (hexane/EtOAc, 4:1); <sup>1</sup>H NMR (CDCl<sub>3</sub>, 270 MHz) δ 4.06 (dd, 1H,  $J = 8.1, 15.5$  Hz, -NCHHCHO-), 4.54 (dd, 1H,  $J = 10.2, 15.5$  Hz, -NCHHCHO-), 5.72 (dd, 1H,  $J = 8.1, 10.2$  Hz, -NCH<sub>2</sub>CHO-), 7.30-7.47 (m, 5H, ArH), 8.18 (d, 2H,  $J = 8.6$  Hz, ArH), 8.29 (d, 2H,  $J = 8.6$  Hz, ArH).

### 2-(*p*-Nitrophenyl)-4-phenyl-2-oxazoline (3b)

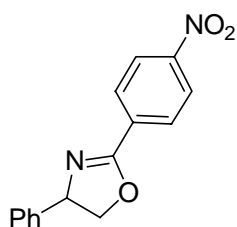

According to the above general procedure, *p*-nitrobenzamide (83 mg, 0.50 mmol) and styrene (108 mg, 1.04 mmol) were used, and the title compound isolated (15 mg, 11%). Spectroscopic data were in agreement with previously reported data for the material.<sup>4</sup> Brown solid; mp 104-107

°C; TLC R<sub>f</sub> 0.26 (hexane/EtOAc, 4:1); <sup>1</sup>H NMR (CDCl<sub>3</sub>, 400 MHz) δ 4.36 (dd, 1H,  $J = 8.4, 8.4$  Hz, -OCHHCHN-), 4.87 (dd, 1H,  $J = 8.4, 10.5$  Hz, -OCHHCHN-), 5.45 (dd, 1H,  $J = 8.4, 10.5$  Hz, -OCH<sub>2</sub>CHN-), 7.29-7.41 (m, 5H, ArH), 8.22 (d, 2H,  $J = 8.8$  Hz, ArH), 8.30 (d, 2H,  $J = 8.8$  Hz, ArH).

### 2-(*n*-Butyl)-5-phenyl-2-oxazoline (2c)

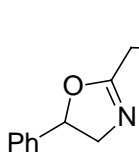

According to the above general procedure, *n*-valeramide (50 mg, 0.50 mmol) and styrene (103 mg, 0.99 mmol) were used, and the title compound isolated (24 mg, 24%). Yellow oil; TLC  $R_f$  0.19 (hexane/EtOAc, 4:1); IR (KBr,  $\text{cm}^{-1}$ )

3350, 3070, 2962, 1738, 1647, 1551, 1454, 1340, 1255, 1196, 1057;  $^1\text{H}$  NMR ( $\text{CDCl}_3$ , 400 MHz)  $\delta$  0.94 (t, 3H,  $J = 7.6$  Hz,  $-\text{CH}_2\text{CH}_3$ ), 1.42 (tq, 2H,  $J = 7.6, 7.6$  Hz,  $-\text{CH}_2\text{CH}_2\text{CH}_3$ ), 1.69 (tt, 2H,  $J = 7.6, 7.6$  Hz,  $-\text{CH}_2\text{CH}_2\text{CH}_2\text{CH}_3$ ), 2.37 (t, 2H,  $J = 7.6$  Hz,  $-\text{CH}_2\text{CH}_2\text{CH}_2\text{CH}_3$ ), 3.75 (dd, 1H,  $J = 8.0, 14.4$  Hz,  $-\text{NCHHCHO-}$ ), 4.23 (dd, 1H,  $J = 10.4, 14.4$  Hz,  $-\text{NCHHCHO-}$ ), 5.44 (dd, 1H,  $J = 8.0, 10.4$  Hz,  $-\text{NCH}_2\text{CHO-}$ ), 7.27-7.39 (m, 5H, ArH);  $^{13}\text{C}$  NMR ( $\text{CDCl}_3$ , 100 MHz)  $\delta$  13.7, 22.3, 27.8, 28.0, 62.5, 80.5, 125.6, 128.1, 128.6, 141.1, 168.1; MS (CI, isobutane)  $m/z$  (relative intensity, %) 204 ( $\text{M}^+ + \text{H}$ , 100); HRMS (CI, isobutane) calcd for  $\text{C}_{17}\text{H}_{15}\text{N}_2\text{O}_3$  ( $\text{M} + \text{H}$ ) $^+$  204.1388, found 204.1383.

### 2-(*n*-Butyl)-4-phenyl-2-oxazoline (3c)

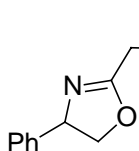

According to the above general procedure, *n*-valeramide (50 mg, 0.50 mmol) and styrene (103 mg, 0.99 mmol) were used, and the title compound isolated (4 mg, 4%). Yellow oil; TLC  $R_f$  0.27 (hexane/EtOAc, 4:1); IR (neat,  $\text{cm}^{-1}$ ) 3292,

3068, 2956, 1734, 1645, 1543, 1456, 1379, 1263, 1178, 1076;  $^1\text{H}$  NMR ( $\text{CDCl}_3$ , 400 MHz)  $\delta$  0.95 (t, 3H,  $J = 7.6$  Hz,  $-\text{CH}_2\text{CH}_3$ ), 1.43 (tq, 2H,  $J = 7.6, 7.6$  Hz,  $-\text{CH}_2\text{CH}_2\text{CH}_3$ ), 1.69 (tt, 2H,  $J = 7.6, 7.6$  Hz,  $-\text{CH}_2\text{CH}_2\text{CH}_2\text{CH}_3$ ), 2.40 (t, 2H,  $J = 7.6$  Hz,  $-\text{CH}_2\text{CH}_2\text{CH}_2\text{CH}_3$ ), 4.06 (dd, 1H,  $J = 8.4, 8.4$  Hz,  $-\text{OCHHCHN-}$ ), 4.59 (dd, 1H,  $J = 8.4, 9.4$  Hz,  $-\text{OCHHCHN-}$ ), 5.16 (dd, 1H,  $J = 8.4, 9.4$  Hz,  $-\text{OCH}_2\text{CHN-}$ ), 7.23-7.38 (m, 5H, ArH);  $^{13}\text{C}$  NMR ( $\text{CDCl}_3$ , 100 MHz)  $\delta$  13.7, 22.3, 27.7, 28.2, 69.5,

74.4, 126.5, 127.4, 128.6, 142.5, 169.0; MS (CI, isobutane)  $m/z$  (relative intensity, %) 204 ( $M^+ + H$ , 100); HRMS (CI, isobutane) calcd for  $C_{17}H_{15}N_2O_3$  ( $M+H$ )<sup>+</sup> 204.1388, found 204.1377.

### 5-Methyl-2-(*p*-nitrophenyl)-5-phenyl-2-oxazoline (3d)

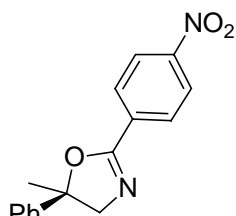

According to the above general procedure, *p*-nitrobenzamide (83 mg, 0.50 mmol) and  $\alpha$ -methylstyrene (121 mg, 1.02 mmol) were used, and the title compound isolated (112 mg, 79%). White solid; mp 81-82

°C; TLC  $R_f$  0.11 (hexane/EtOAc, 4:1); IR (KBr,  $cm^{-1}$ ) 3435, 3066, 2976, 1645, 1595, 1520, 1346, 1271, 1066;  $^1H$  NMR ( $CDCl_3$ , 400 MHz)  $\delta$  1.82 (s, 3H,  $-CH_3$ ), 4.21 (s, 2H,  $-NCH_2CO-$ ), 7.26-7.40 (m, 5H, *ArH*), 8.20 (d, 2H,  $J = 8.8$  Hz, *ArH*), 8.29 (d, 2H,  $J = 8.8$  Hz, *ArH*);  $^{13}C$  NMR ( $CDCl_3$ , 100 MHz)  $\delta$  28.3, 69.0, 87.7, 123.5, 124.1, 127.5, 128.5, 129.0, 133.6, 144.7, 149.3, 161.0; MS (EI)  $m/z$  (relative intensity, %) 282 ( $M^+$ , 46), 162 (100), 146 (10); HRMS (EI) calcd for  $C_{16}H_{14}N_2O_3$  ( $M$ )<sup>+</sup> 283.1004, found 282.1009.

### 4-Methyl-2-(*p*-nitrophenyl)-5-phenyl-2-oxazoline (2e)

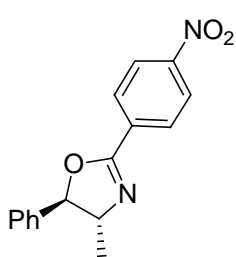

According to the above general procedure, *p*-nitrobenzamide (83 mg, 0.50 mmol) and *trans*- $\beta$ -methylstyrene (118 mg, 1.00 mmol) were used, and the title compound isolated (93 mg, 65%). Spectroscopic data were in agreement with previously reported data for the material.<sup>5</sup> Orange solid; mp

70-72 °C; TLC  $R_f$  0.29 (hexane/EtOAc, 4:1);  $^1H$  NMR ( $CDCl_3$ , 270 MHz)  $\delta$  1.51 (d, 3H,  $J = 6.8$  Hz,  $-CHCH_3$ ), 4.28 (dq, 1H,  $J = 6.8, 6.8$  Hz,  $-OCHCHN-$ ), 5.16 (d, 1H,  $J = 6.8$  Hz,  $-OCHCHN-$ ), 7.30-7.45 (m, 5H, *ArH*), 8.19 (d, 2H,  $J = 8.8$  Hz, *ArH*), 8.29 (d, 2H,  $J = 8.8$  Hz, *ArH*).

### 5-Methyl-2-(*p*-nitrophenyl)-4-phenyl-2-oxazoline (3e)

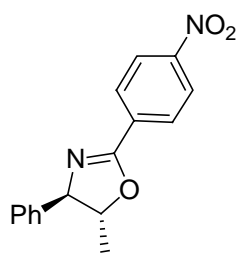

According to the above general procedure, *p*-nitrobenzamide (83 mg, 0.50 mmol) and *trans*- $\beta$ -methylstyrene (118 mg, 1.00 mmol) were used, and the title compound isolated (10 mg, 7%). White solid; mp 69-70 °C; TLC  $R_f$  0.37 (hexane/EtOAc, 4:1); IR (KBr,  $\text{cm}^{-1}$ ) 3438, 2924, 1645, 1599,

1525, 1346, 1064;  $^1\text{H}$  NMR ( $\text{CDCl}_3$ , 400 MHz)  $\delta$  1.60 (d, 3H,  $J = 6.4$  Hz,  $-\text{CHCH}_3$ ), 4.67 (dq, 1H,  $J = 6.4, 7.6$  Hz,  $-\text{OCHCHN}-$ ), 4.90 (d, 1H,  $J = 7.6$  Hz,  $-\text{OCHCHN}-$ ), 7.27-7.40 (m, 5H, ArH), 8.21 (d, 2H,  $J = 8.4$  Hz, ArH), 8.29 (d, 2H,  $J = 8.4$  Hz, ArH);  $^{13}\text{C}$  NMR ( $\text{CDCl}_3$ , 100 MHz)  $\delta$  20.7, 77.5, 84.9, 123.5, 126.6, 127.9, 128.9, 129.4, 133.7, 141.3, 149.6, 162.2; MS (EI)  $m/z$  (relative intensity, %) 282 ( $\text{M}^+$ , 3), 267 ( $\text{M}^+ - \text{Me}$ , 1), 238 (100), 192 (39), 165 (16); HRMS (CI, isobutane) calcd for  $\text{C}_{16}\text{H}_{15}\text{N}_2\text{O}_3$  ( $\text{M} + \text{H}$ ) $^+$  283.1083, found 283.1089.

### *cis*-2-(*p*-Nitrophenyl)-3a,4,5,9b-tetrahydronaphtho[2,1-*d*]oxazole (2f)

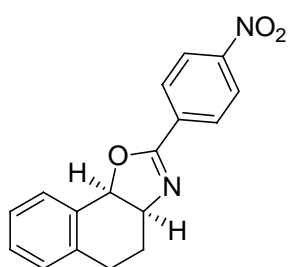

According to the above general procedure, *p*-nitrobenzamide (83 mg, 0.50 mmol) and 1,2-dihydronaphthalene (130 mg, 1.00 mmol) were used, and the title compound isolated (71 mg, 55%). Yellow solid; mp 69-70 °C; TLC  $R_f$  0.09 (hexane/EtOAc, 4:1); IR (KBr,  $\text{cm}^{-1}$ ) 3384, 3068, 2939,

1641, 1595, 1520, 1444, 1342, 1072;  $^1\text{H}$  NMR ( $\text{CDCl}_3$ , 400 MHz)  $\delta$  2.03-2.12 (m, 2H,  $-\text{NCHCH}_2\text{CH}_2-$ ), 2.61 (ddd, 1H,  $J = 5.0, 5.0, 15.5$  Hz,  $-\text{NCHCH}_2\text{CHH}-$ ), 2.77 (ddd, 1H,  $J = 5.0, 9.9, 15.5$  Hz,  $-\text{NCHCH}_2\text{CHH}-$ ), 4.79 (ddd, 1H,  $J = 5.0, 5.0, 9.8$  Hz,  $-\text{NCHCHO}-$ ), 5.74 (d, 1H,  $J = 9.8$  Hz,  $-\text{NCHCHO}-$ ), 7.16-7.18 (m, 1H, ArH), 7.27-7.32 (m, 2H, ArH), 7.47-7.50 (m, 1H, ArH), 8.10 (d, 2H,  $J = 8.4$  Hz, ArH), 8.22 (d, 2H,  $J = 8.4$  Hz, ArH);  $^{13}\text{C}$  NMR ( $\text{CDCl}_3$ , 100 MHz)  $\delta$  25.6, 28.3, 65.1, 79.6, 123.4, 126.8, 128.4, 128.8, 129.2, 130.5, 132.0, 133.5, 139.6, 149.4, 162.3; MS

(CI, isobutane)  $m/z$  (relative intensity, %) 295 ( $M^+ + H$ , 100); HRMS (CI, isobutane) calcd for  $C_{17}H_{15}N_2O_3$  ( $M+H$ )<sup>+</sup> 295.1083, found 295.1088.

#### 5-(*n*-Hexyl)-2-(*p*-nitrophenyl)-2-oxazoline (2g)

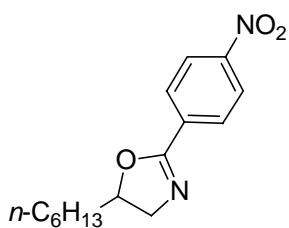

According to the above general procedure, *p*-nitrobenzamide (83 mg, 0.50 mmol) and 1-octene (108 mg, 0.96 mmol) were used, and the title compound isolated (49 mg, 35%). White solid; mp 77-79 °C; TLC  $R_f$  0.19 (hexane/EtOAc, 4:1); IR (KBr,  $cm^{-1}$ ) 3435, 2925, 1647,

1599, 1522, 1348, 1076;  $^1H$  NMR ( $CDCl_3$ , 400 MHz)  $\delta$  0.90 (t, 3H,  $J = 6.5$  Hz,  $-CH_2CH_3$ ), 1.24-1.56 (m, 8H,  $-CH_2CH_2CH_2CH_2CH_2CH_3$ ), 1.56-1.88 (m, 2H,  $-CH_2-(CH_2)_4-CH_3$ ), 3.71 (dd, 1H,  $J = 7.6, 15.1$  Hz,  $-NCHHCHO-$ ), 4.17 (dd, 1H,  $J = 9.6, 15.1$  Hz,  $-NCHHCHO-$ ), 4.72-4.83 (m, 1H,  $-NCH_2CHO-$ ), 8.11 (d, 2H,  $J = 8.4$  Hz,  $ArH$ ), 8.27 (d, 2H,  $J = 8.4$  Hz,  $ArH$ );  $^{13}C$  NMR ( $CDCl_3$ , 100 MHz)  $\delta$  14.1, 22.5, 25.1, 29.0, 31.7, 35.4, 60.3, 80.9, 123.5, 129.1, 133.9, 149.4, 162.2; MS (EI)  $m/z$  (relative intensity, %) 276 ( $M^+$ , 5), 205 ( $M^+ - n-C_5H_{11}$ , 11), 191 ( $M^+ - n-C_6H_{13}$ , 28), 162 (94), 150 (63); HRMS (CI, isobutane) calcd for  $C_{15}H_{21}N_2O_3$  ( $M+H$ )<sup>+</sup> 277.1552, found 277.1557. Anal. Calcd for  $C_{15}H_{20}N_2O_3$ : C, 65.20; H, 7.30; N, 10.14. Found: C, 64.91; H, 7.27; N, 9.91.

#### 4-(*n*-Hexyl)-2-(*p*-nitrophenyl)-2-oxazoline (3g)

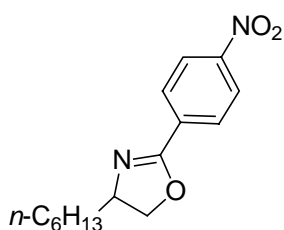

According to the above general procedure, *p*-nitrobenzamide (83 mg, 0.50 mmol) and 1-octene (108 mg, 0.96 mmol) were used, and the title compound isolated (21 mg, 15%). White solid; mp 48-50 °C; TLC  $R_f$  0.39 (hexane/EtOAc, 4:1); IR (KBr,  $cm^{-1}$ ) 3435, 2925, 1649,

1525, 1348, 1070;  $^1H$  NMR ( $CDCl_3$ , 270 MHz)  $\delta$  0.89 (t, 3H,  $J = 6.6$  Hz,  $-CH_2CH_3$ ), 1.30-1.63 (m,

9H,  $-CHHCH_2CH_2CH_2CH_2CH_3$ ), 1.70-1.77 (m, 1H,  $-CHH-(CH_2)_4-CH_3$ ), 4.09 (dd, 1H,  $J = 8.1$ , 8.1 Hz,  $-OCHHCHN-$ ), 4.27-4.38 (m, 1H,  $-OCH_2CHN-$ ), 4.55 (dd, 1H,  $J = 8.1$ , 9.5 Hz,  $-OCHHCHN-$ ), 8.11 (d, 2H,  $J = 9.2$  Hz, ArH), 8.26 (d, 2H,  $J = 9.2$  Hz, ArH);  $^{13}C$  NMR (CDCl<sub>3</sub>, 68 MHz)  $\delta$  14.1, 22.6, 25.9, 29.2, 31.7, 35.8, 67.2, 73.1, 123.5, 129.2, 133.8, 149.4, 161.6; MS (EI)  $m/z$  (relative intensity, %) 276 ( $M^+$ , 1), 206 (32), 191 ( $M^+ - n-C_6H_{13}$ , 89), 167 (39), 163 (28), 150 (69); HRMS (CI, isobutane) calcd for C<sub>15</sub>H<sub>21</sub>N<sub>2</sub>O<sub>3</sub> ( $M+H$ )<sup>+</sup> 277.1552, found 277.1550.

### ***trans*-4,5-Diethyl-2-(*p*-nitrophenyl)-2-oxazoline (2h)**

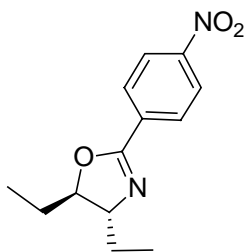

According to the above general procedure, *p*-nitrobenzamide (83 mg, 0.50 mmol) and *trans*-3-hexene (84 mg, 0.99 mmol) were used, and the title compound isolated (89 mg, 71%). Spectroscopic data were in agreement with previously reported data for the material.<sup>6</sup> Yellow solid; mp

47-50 °C; TLC R<sub>f</sub> 0.31 (hexane/EtOAc, 4:1);  $^1H$  NMR (CDCl<sub>3</sub>, 270 MHz)  $\delta$  1.02 (t, 3H,  $J = 7.4$  Hz,  $-CH_2CH_3$ ), 1.04 (t, 3H,  $J = 7.3$  Hz,  $-CH_2CH_3$ ), 1.56-1.81 (m, 4H,  $CH_3CH_2CHCHCH_2CH_3$ ), 3.84 (dt, 1H,  $J = 6.4$ , 6.4 Hz,  $-NCHCHO-$ ), 4.30 (dt, 1H,  $J = 6.4$ , 6.4 Hz,  $-NCHCHO-$ ), 8.12 (d, 2H,  $J = 9.0$  Hz, ArH), 8.26 (d, 2H,  $J = 9.0$  Hz, ArH);  $^{13}C$  NMR (CDCl<sub>3</sub>, 68 MHz)  $\delta$  9.2, 9.9, 28.2, 28.5, 73.0, 86.4, 123.4, 129.1, 134.0, 149.3, 160.9; MS (EI)  $m/z$  (relative intensity, %) 248 ( $M^+$ , 1), 219 ( $M^+ - Et$ , 62), 190 (22), 175 (40), 149 (18).

### ***cis*-4,5-Diethyl-2-(*p*-nitrophenyl)-2-oxazoline (2i)**

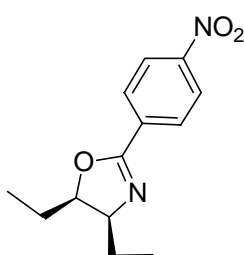

According to the above general procedure, *p*-nitrobenzamide (83 mg, 0.50 mmol) and *cis*-3-hexene (84 mg, 1.00 mmol) were used, and the title compound isolated (85 mg, 68%). Spectroscopic data were in



agreement with previously reported data for the material.<sup>6</sup> Orange solid; mp 78-81 °C; TLC  $R_f$  0.29 (hexane/EtOAc, 4:1);  $^1\text{H}$  NMR ( $\text{CDCl}_3$ , 270 MHz)  $\delta$  1.12 (t, 3H,  $J = 7.3$  Hz,  $-\text{CH}_2\text{CH}_3$ ), 1.13 (t, 3H,  $J = 7.3$  Hz,  $-\text{CH}_2\text{CH}_3$ ), 1.47-1.77 (m, 4H,  $\text{CH}_3\text{CH}_2\text{CHCHCH}_2\text{CH}_3$ ), 4.14 (dt, 1H,  $J = 5.1$ , 9.3 Hz,  $-\text{NCHCHO}-$ ), 4.65 (dt, 1H,  $J = 5.1$ , 8.9 Hz,  $-\text{NCHCHO}-$ ), 8.13 (d, 2H,  $J = 9.0$  Hz,  $\text{ArH}$ ), 8.26 (d, 2H,  $J = 9.0$  Hz,  $\text{ArH}$ );  $^{13}\text{C}$  NMR ( $\text{CDCl}_3$ , 68 MHz)  $\delta$  11.2, 11.8, 22.5, 23.3, 70.2, 85.2, 123.4, 129.1, 134.2, 149.3, 161.0; MS (EI)  $m/z$  (relative intensity, %) 248 ( $\text{M}^+$ , 2), 219 ( $\text{M}^+ - \text{Et}$ , 60), 190 (37), 175 (56), 149 (18).

<sup>1</sup>H NMR spectra of reaction between benzamide and *t*-BuOI as mentioned in the text (ref. 11)

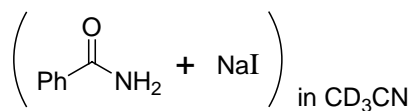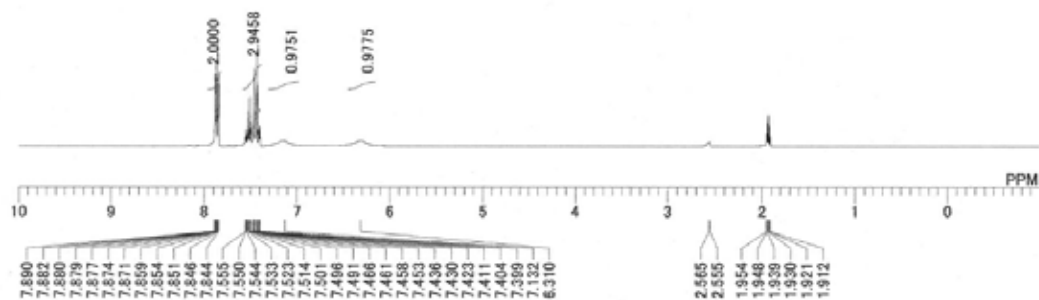

**Figure SI-1.** <sup>1</sup>H-NMR spectrum of benzamide (0.02 mmol) and NaI (0.02 mmol) in CD<sub>3</sub>CN (0.5 mL) at room temperature.

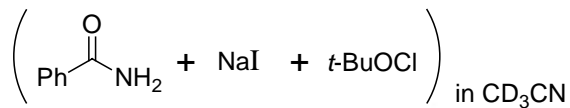

after 30 min

Change of the chemical shift corresponding to the phenyl group

Disappearance of the signals of N-H

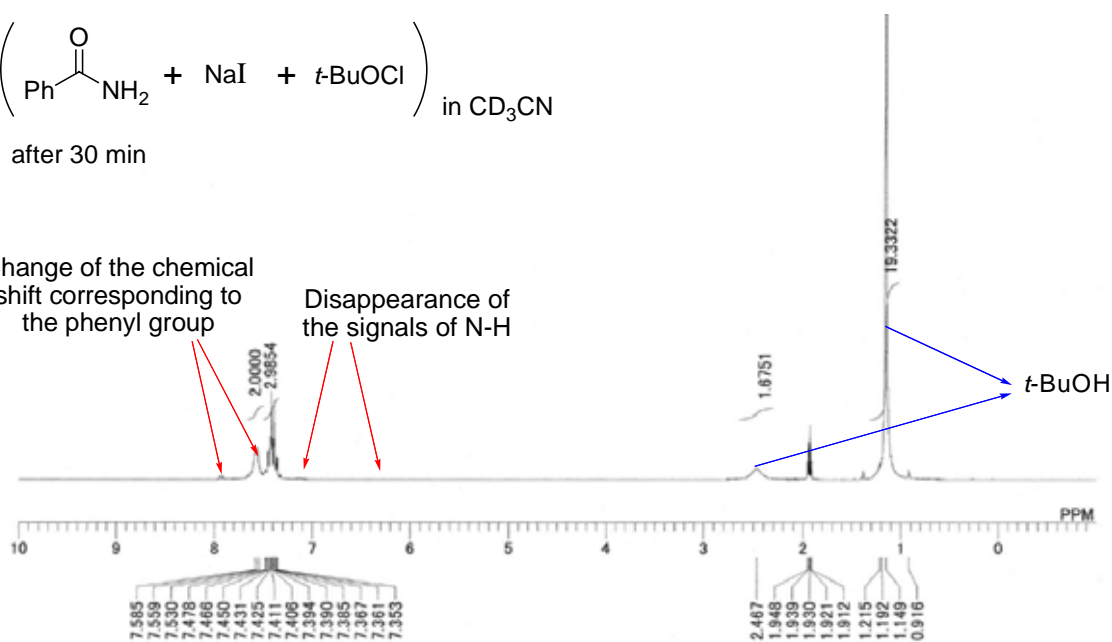

**Figure SI-2.** <sup>1</sup>H-NMR spectrum after treating the above mixture with *t*-BuOCl (0.02 mmol) in CD<sub>3</sub>CN at room temperature.

## References

- 1 A. I. Meyers, M. A. Hanagan, L. M. Trefonas and R. J. Baker, *Tetrahedron* 1983, **39**, 1991-1999.
- 2 L. N. Pridgen, L. B. Killmer and R. L. Webb, *J. Org. Chem.* 1982, **47**, 1985-1989.
- 3 J. G. Badiang and J. Aubé, *J. Org. Chem.* 1996, **61**, 2484-2487.
- 4 P. Wipf and X. Wang, *J. Comb. Chem.* 2002, **4**, 656-660.
- 5 S. Crosignani and D. Swinnen, *J. Comb. Chem.* 2005, **7**, 688-696.
- 6 T. A. Foglia, L. M. Gregory and G. Maerker, *J. Org. Chem.* 1970, **35**, 3779-3785.
